# Supplementary material for: Low-temperature Li–S battery enabled by CoFe bimetallic catalysts
Source: Royal Society of Chemistry journal article supplement (doi:10.1039/d2ta00406b), 2022-01-01
Supplement: d2ta00406b1.pdf [file d2ta00406b1.pdf]

## Supporting Information

### **Low-temperature Li-S Battery Enabled by CoFe bimetallic Catalysts**

Ning Gao<sup>a</sup>, Yujiao Zhang<sup>a</sup>, Chong Chen<sup>b</sup>, Bao Li<sup>c</sup>, Wenbiao Li<sup>a</sup>, Huiqiang Lu<sup>d</sup>, Le Yu<sup>b\*</sup>,  
Shumin Zheng<sup>a\*</sup>, and Bao Wang<sup>a\*</sup>

<sup>a</sup>*State Key Laboratory of Biochemical Engineering, Institute of Process Engineering, Chinese Academy of Sciences, Beijing, 100190, P. R. China. E-mail: [smzheng@ipe.ac.cn](mailto:smzheng@ipe.ac.cn); [baowang@ipe.ac.cn](mailto:baowang@ipe.ac.cn)*

<sup>b</sup>*State Key Lab of Organic-Inorganic Composites, Beijing Advanced Innovation Center for Soft Matter Science and Engineering, Beijing University of Chemical Technology, Beijing, 100029, P. R. China. E-mail: [yule@mail.buct.edu.cn](mailto:yule@mail.buct.edu.cn)*

<sup>c</sup>*School of Chemistry and Chemical Engineering, Henan Normal University, Xinxiang, 453007, P. R. China*

<sup>d</sup>*Ganzhou Key Laboratory for Drug Screening and Discovery, School of Geography and Environmental Engineering, Gannan Normal University, Ganzhou, 341000, P. R. China*

## Experimental Section

### Synthesis of CoFe@C@CNFs

The impregnation method, a classic method for preparing heterogeneous catalysts, was used to synthesize the target product.  $\text{CoCl}_2 \cdot 6\text{H}_2\text{O}$  and  $\text{FeCl}_3 \cdot 6\text{H}_2\text{O}$  with the same amount of substance were evenly mixed in 30 mL deionized water, to obtain a  $\text{Co}^{2+}/\text{Fe}^{3+}$  metal salt mixed solution. The pre-cut trans blot filter paper (denoted as BP) was soaked in the mixed solution for 2 h. The size of the BP was calculated according to the actual shrinkage rate and cut into the disk shape required by the cathode electrode. Then, the BP adsorbed metal ions were dried at 60 °C for 12 h. Finally, the dried BP was calcined for 2 h in the Ar/ $\text{H}_2$  atmosphere at 800 °C to prepare the CoFe@C@CNFs. In this work, we adopted metal ion concentrations of 20, 40, and 80 mM, respectively. We marked the prepared samples in different proportions as CoFe@C@CNFs-20, CoFe@C@CNFs-40, and CoFe@C@CNFs-80. For comparison, the synthesis of CNFs was the same as above, but  $\text{CoCl}_2 \cdot 6\text{H}_2\text{O}$  and  $\text{FeCl}_3 \cdot 6\text{H}_2\text{O}$  were not added to the deionized water.

### Preparation and Visualized Adsorption Test of $\text{Li}_2\text{S}_6$

The sublimated sulfur and  $\text{Li}_2\text{S}$  (molar ratio = 5:1) were dissolved in 1,3-dioxolane/1,2-dimethoxyethane (DOL/DME, volume ratio was 1:1), to prepare the  $\text{Li}_2\text{S}_6$  solution (1 M, molar concentration calculated according to sulfur atoms). The mixture was stirred at 60 °C for 48 h, and the whole process was carried out in an Ar-filled glovebox. Then, 10 mg of samples (CNFs or CoFe@C@CNFs) were placed in the 3 mL of the diluted  $\text{Li}_2\text{S}_6$  solutions (5 mM) for 3 h.

### Characterization

The morphologies and structures of the prepared samples were characterized with Zeiss Supra55 Scanning Electron Microscopy (SEM) and FEI TECNAIG2 F30 Transmission Electron Microscopy (TEM). X-ray diffraction (XRD) measurements were performed using Rigaku D/max 2550 PC (CuK $\alpha$ ). Raman spectra were recorded by a Renishaw Raman spectroscope under 532 nm laser excitation. Brunauer Emmett Teller (BET) surface area

measurements were measured by nitrogen adsorption and desorption method using an ASAP 2020 Analyser. The accurate elemental composition and valence state were determined by X-ray photoelectron spectroscopy (XPS) were collected at an Escalab 250Xi spectrophotometer. Thermogravimetric (TG) analysis was recorded by a TG-209F1 under air atmosphere with a heating rate of 5°C min<sup>-1</sup>.

### **Cell Assembly and Electrochemical Measurements**

The Li<sub>2</sub>S<sub>6</sub> catholyte was added to the synthesized cathode to form Li<sub>2</sub>S<sub>6</sub>/CoFe@C@CNFs composite electrode. The S loading is 1 mg cm<sup>-2</sup>, corresponding to 26 μL of 0.2 M Li<sub>2</sub>S<sub>6</sub>. The electrolyte was 1.0 M bis-(trifluoromethane) sulfonamide lithium (LiTFSI) in DOL/DME (volume ratio = 1:1) with 0.2 M LiNO<sub>3</sub>, 50 μL electrolyte was used in each cell. CR2032 coin cells were assembled using the Li<sub>2</sub>S<sub>6</sub>/CoFe@C@CNFs cathode, lithium metal anode, and Celgard 2300 separator. Galvanostatic discharge/charge tests were recorded on the Neware battery test system between 1.7 and 2.8 V (*vs.* Li/Li<sup>+</sup>). The cyclic voltammetry (CV) and electrochemical impedance spectroscopy (EIS) were conducted by a bio-logic VMP3 electrochemical workstation.

### **Assembly and Measurement of Symmetrical Cells**

Li<sub>2</sub>S<sub>6</sub> (0.5 M) provides the active substance and two same electrodes (CNFs or CoFe@C@CNFs) were served as the working and counter electrodes for the cell assembly. The electrode area was around 1 cm<sup>2</sup>. The assembled symmetric cells were tested by CV at a scan rate of 20 mV s<sup>-1</sup> (potential window -0.8-0.8 V).

### **Theoretical computations**

All DFT calculations were performed using the CP2K package,<sup>[1,2]</sup> employing a mixed scheme of plane waves and Gaussian-type basis sets. Plane waves with a cutoff of 420 Ry were used to calculate the charge density. The Kohn-Sham orbitals were expanded in Gaussian basis sets with triple-zeta plus polarization quality. The Goedecker pseudopotentials and the Perdew-Burke-Ernzerhof (PBE) functional were used.<sup>[3,4]</sup> The climbing nudged elastic band (CI-NEB)

method<sup>[5]</sup> was applied to search the transition states (TS) of elementary reaction. In each CI-NEB pathway, 8 images with starting and ending points were used to locate a saddle point on the potential energy surface.

The calculation of the adsorption energy was carried out by the following formula:<sup>[6]</sup>

$$E_{\text{bind}} = E_{\text{total}} - E_{\text{Li}_2\text{S}_x} - E_{\text{host}}$$

Where  $E_{\text{bind}}$ ,  $E_{\text{total}}$ ,  $E_{\text{Li}_2\text{S}_x}$ , and  $E_{\text{host}}$  are the adsorption energy value of the system, the total energy of the model, energy of  $\text{Li}_2\text{S}_x$ , and the energy of the surface model, respectively.

Gibbs free energy is the nature of the reaction system, the function of status, and is only determined by the beginning and end states of the system. The reaction of each step can be written as following equations:

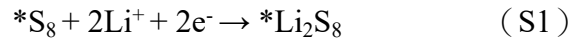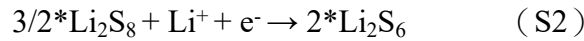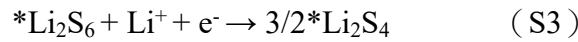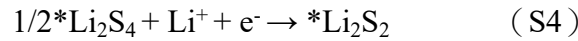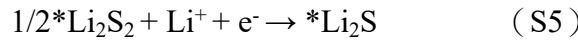

The Gibbs free energies for all of the reaction steps as following equations:

$$\Delta G_1 = G(*\text{Li}_2\text{S}_8) - G(*\text{S}_8) - 2G(\text{Li}) \quad (\text{S6})$$

$$\Delta G_2 = G(*\text{Li}_2\text{S}_6) + 2G(\text{S}) - 2G(*\text{Li}_2\text{S}_8) \quad (\text{S7})$$

$$\Delta G_3 = G(*\text{Li}_2\text{S}_4) + 2G(\text{S}) - 2G(*\text{Li}_2\text{S}_6) \quad (\text{S8})$$

$$\Delta G_4 = G(*\text{Li}_2\text{S}_2) + 2G(\text{S}) - 2G(*\text{Li}_2\text{S}_4) \quad (\text{S9})$$

$$\Delta G_5 = G(*\text{Li}_2\text{S}) + G(\text{S}) - 2G(*\text{Li}_2\text{S}_2) \quad (\text{S10})$$

For the DFT calculation of adsorbate,  $G = H - TS = E_{\text{DFT}} + \text{ZPE} - TS$ , where ZPE is zero-point energy and TS is the enthalpic temperature correction. The largest delta G will determine the overall speed of the Li-S battery reaction, and the corresponding reaction step is called the rate-

determining step.<sup>[6]</sup>

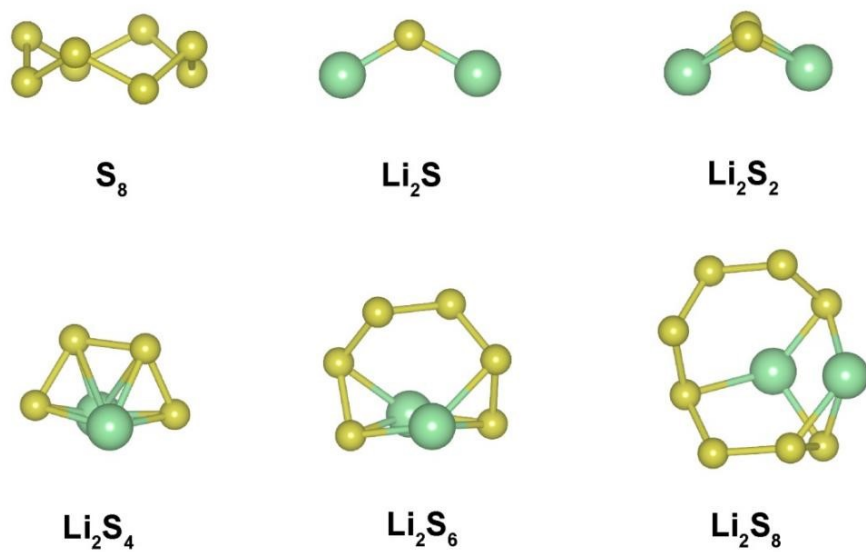

**Fig. S1** Optimized configurations of sulfur, polysulfides, and disulfide.

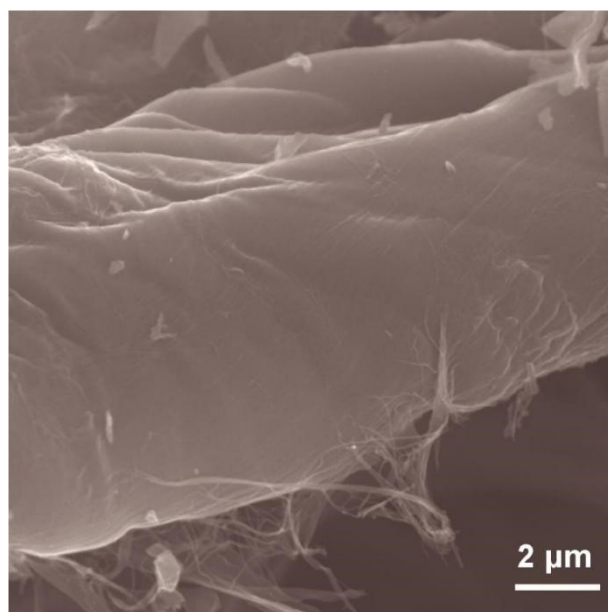

**Fig. S2** Transverse SEM image of CoFe@C@CNFs.

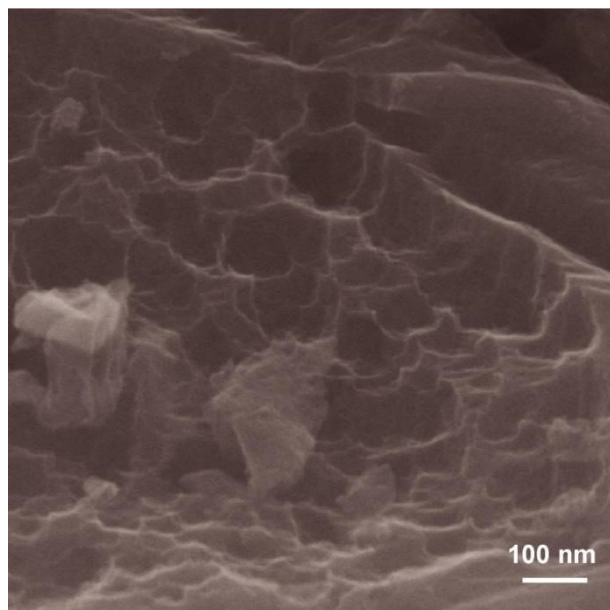

**Fig. S3** Longitudinal SEM image of CoFe@C@CNFs.

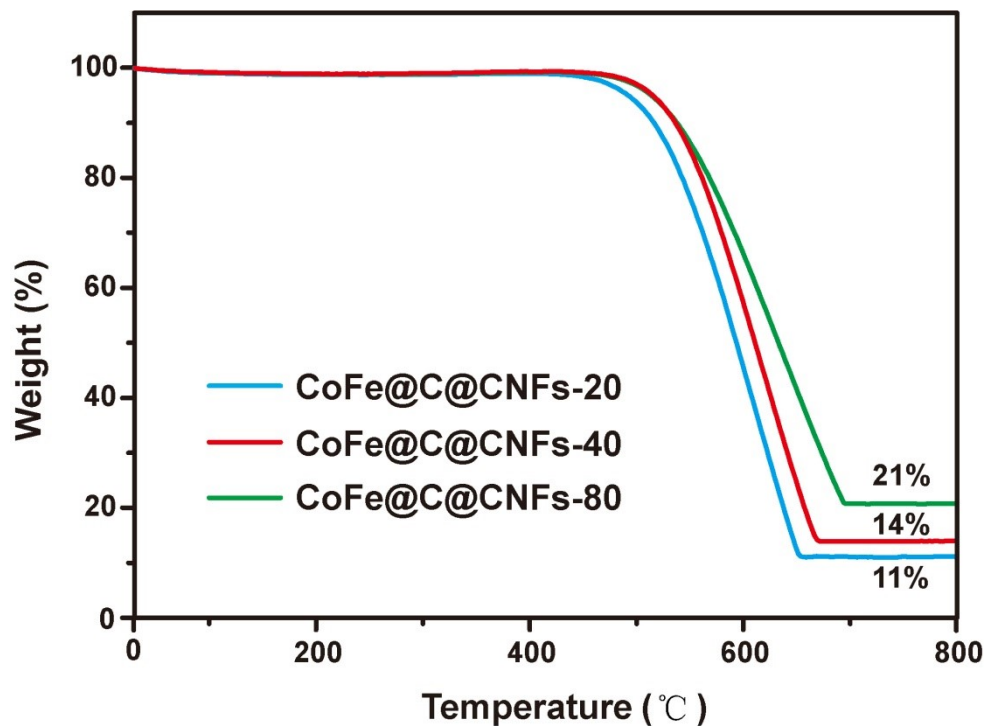

**Fig. S4.** TG data of composite materials with different metal concentrations.

During the thermogravimetric test, the Co-Fe particles in the CoFe@C@CNFs react with oxygen to form  $\text{Co}_3\text{O}_4$  and  $\text{Fe}_2\text{O}_3$ . The contents of the two metals can be estimated by the following conservation of mass (Take CoFe@C@CNFs-20 as an example):

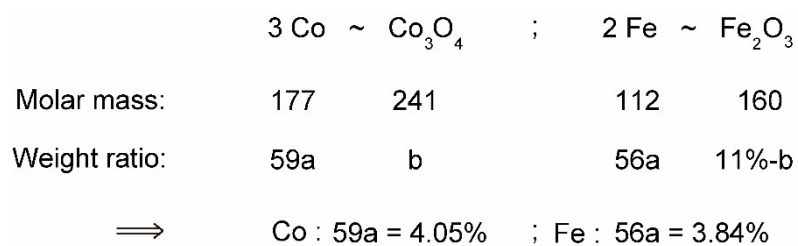

Similarly, the content of other materials is shown in Table S1.



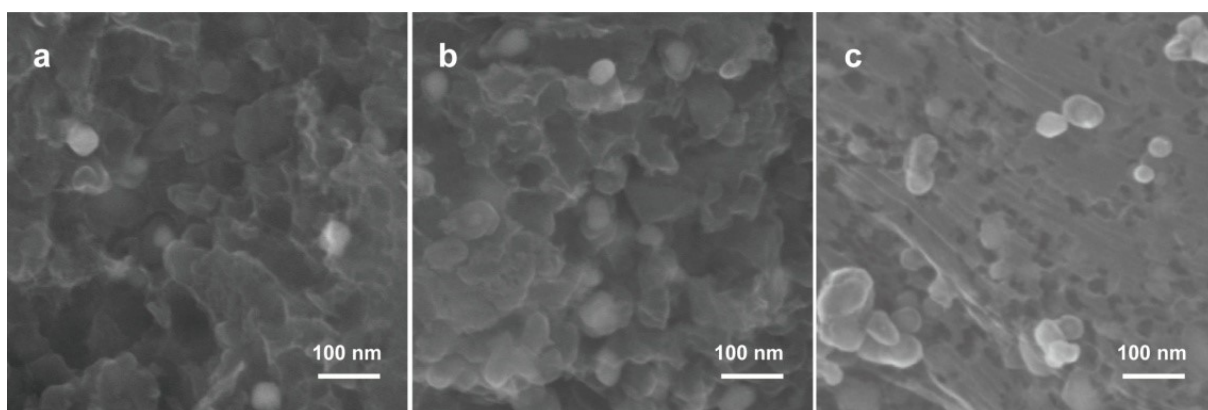

**Fig. S5.** SEM images of (a) CoFe@C@CNFs-20, (b) CoFe@C@CNFs-40 and (c) CoFe@C@CNFs-80.

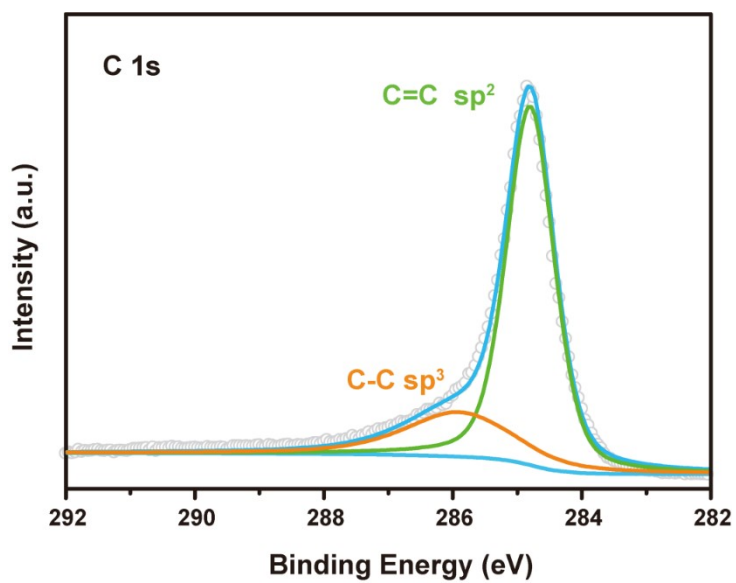

**Fig. S6** C 1s XPS spectrum of CoFe@C@CNFs.

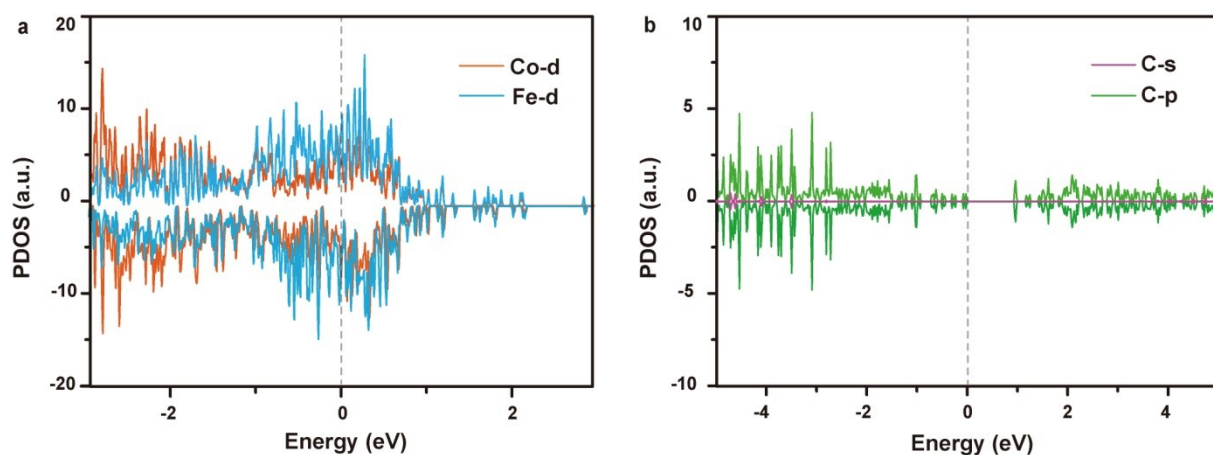

**Fig. S7** Calculated spin-polarized DOS of the (a) CoFe surface and the (b) CNFs surface structure by using PBE functional. Dashed lines represent the Fermi level (shifted to 0 eV).

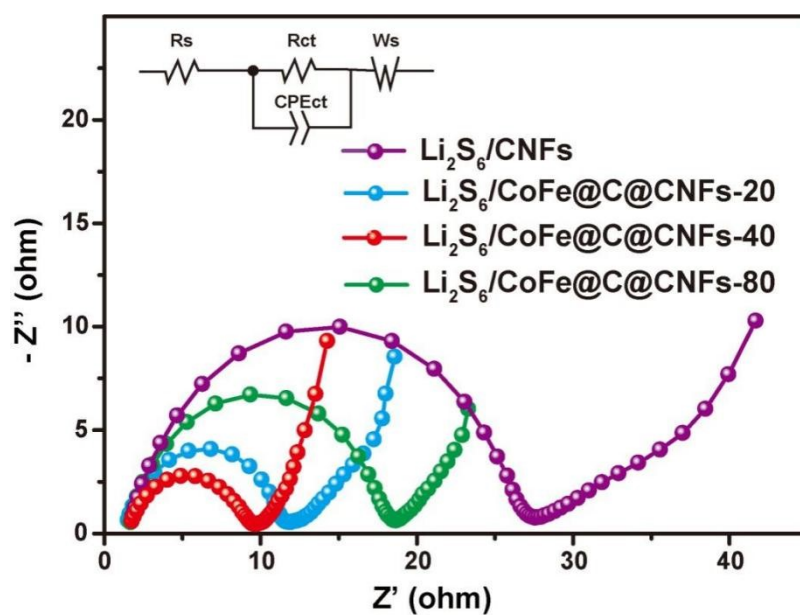

**Fig. S8** EIS of Li-S batteries with different materials. Inset: the corresponding equivalent circuit model.

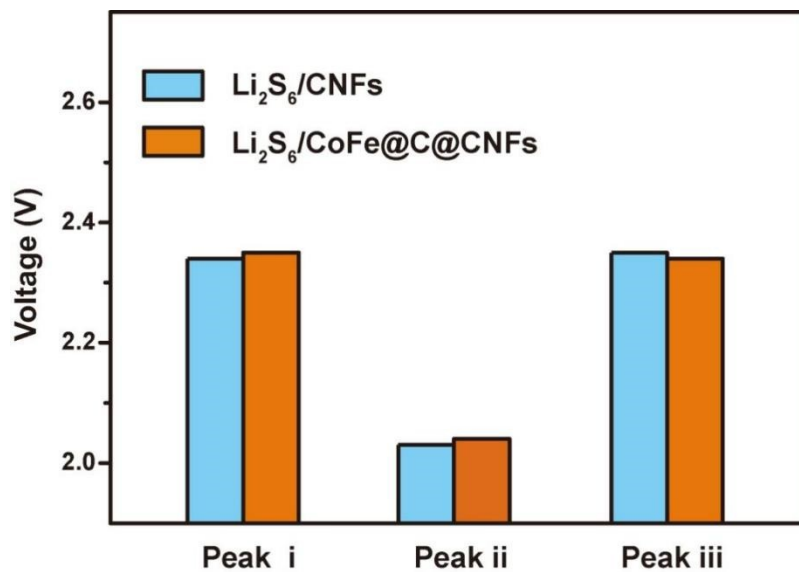

**Fig. S9** Peak voltages of Li-S batteries using  $\text{Li}_2\text{S}_6/\text{CNFs}$  and  $\text{Li}_2\text{S}_6/\text{CoFe@C@CNFs}$ .

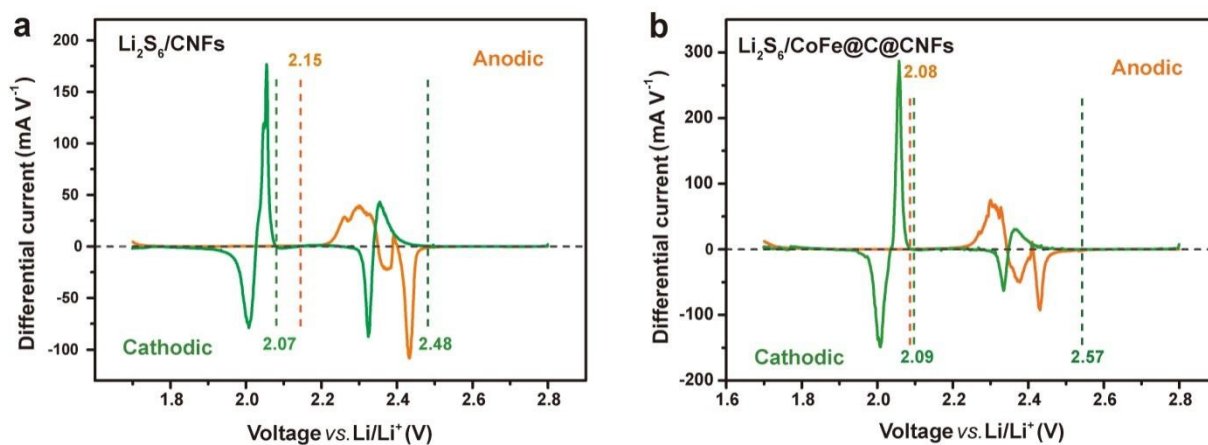

**Fig. S10** Onset potentials of Li-S batteries using (a)  $\text{Li}_2\text{S}_6/\text{CNFs}$  and (b)  $\text{Li}_2\text{S}_6/\text{CoFe@C@CNFs}$ .

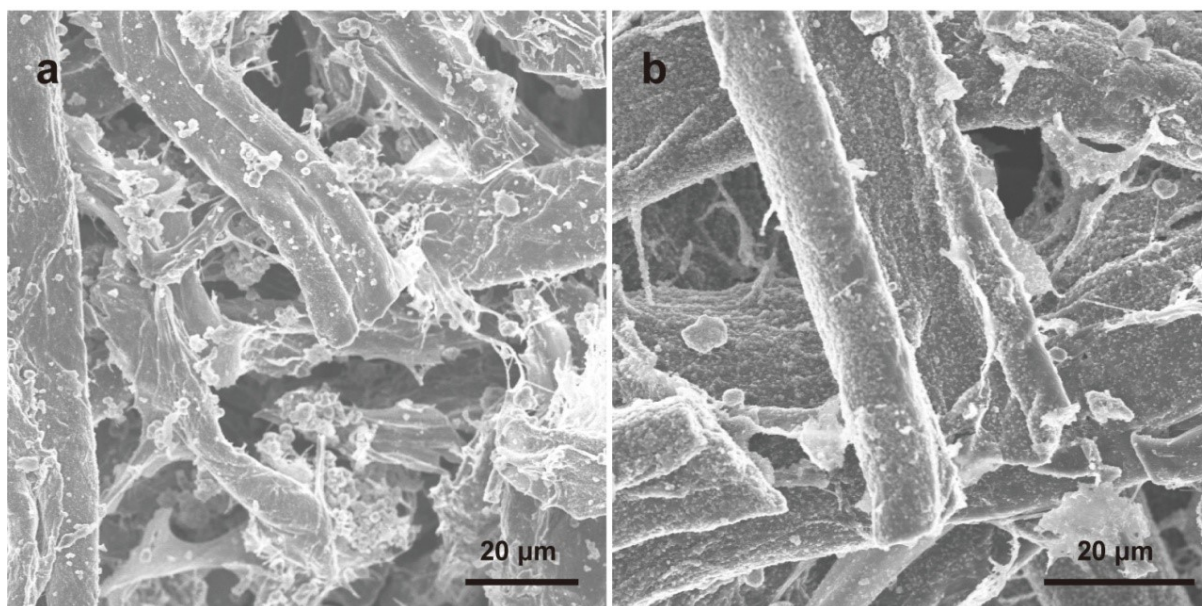

**Fig. S11** Surface morphologies of (a) CNFs and (b) CoFe@C@CNFs after 300 cycles at 5 C.

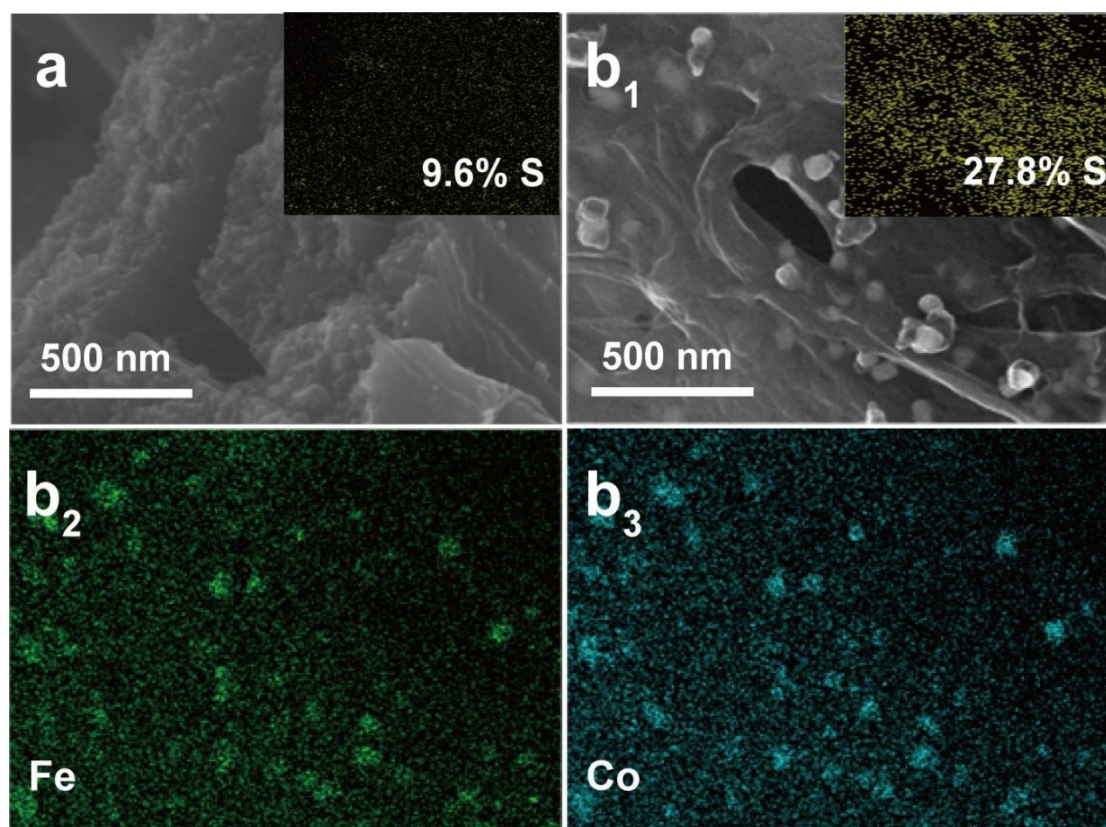

**Fig. S12** (a) SEM image of CNFs after cycling. (b) SEM image and the corresponding elemental mapping images of CoFe@C@CNFs after cycling. Inset: S element mapping.

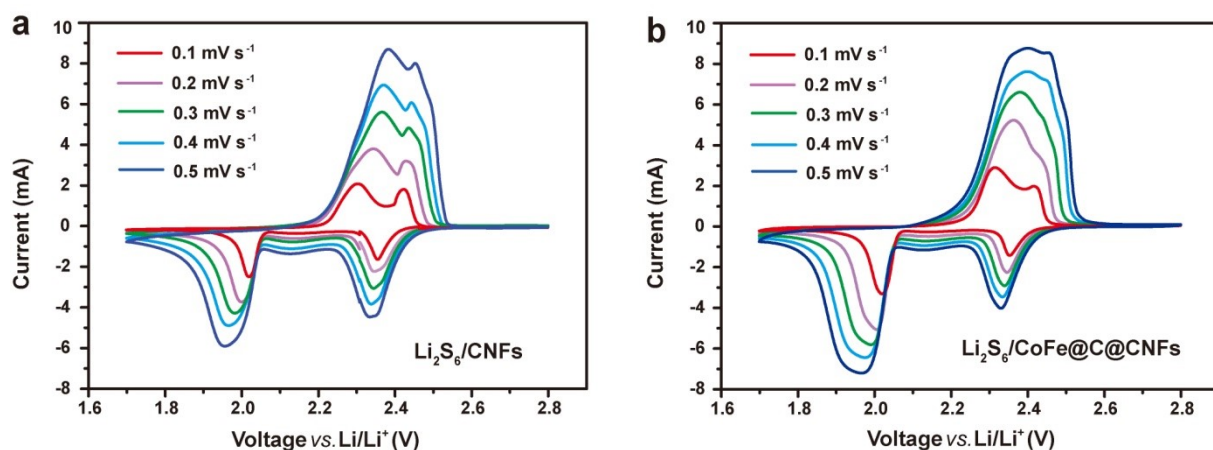

**Fig. S13** CV curves at various voltage scan rates of Li-S batteries using (a)  $\text{Li}_2\text{S}_6/\text{CNFs}$  and (b)  $\text{Li}_2\text{S}_6/\text{CoFe@C@CNFs}$ .

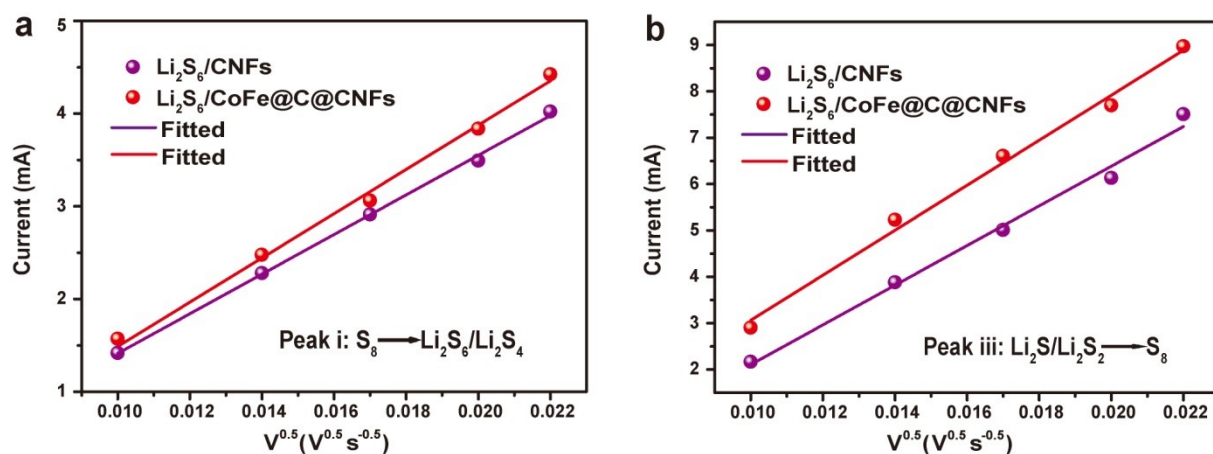

**Fig. S14** Linear fits of the redox peak currents of Li-S batteries with  $\text{Li}_2\text{S}_6/\text{CNFs}$  and  $\text{Li}_2\text{S}_6/\text{CoFe@C@CNFs}$  at various voltage scan rates.

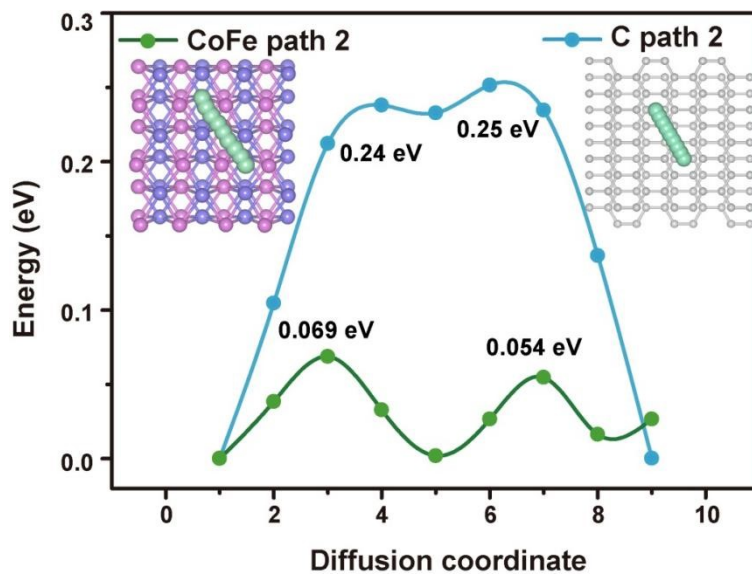

**Fig. S15** Energy profile of lithium diffusion along path II for CoFe and CNFs. Inset: The corresponding schematic diagram of the top view of the considered migration paths for Li diffusion in CNFs and CoFe supercell.

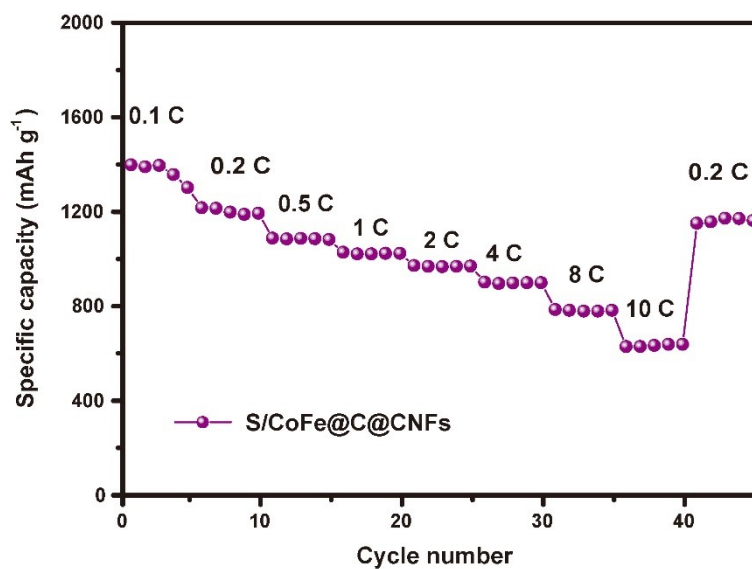

**Fig. S16** Rate performances of Li-S batteries using S/CoFe@C@CNFs.

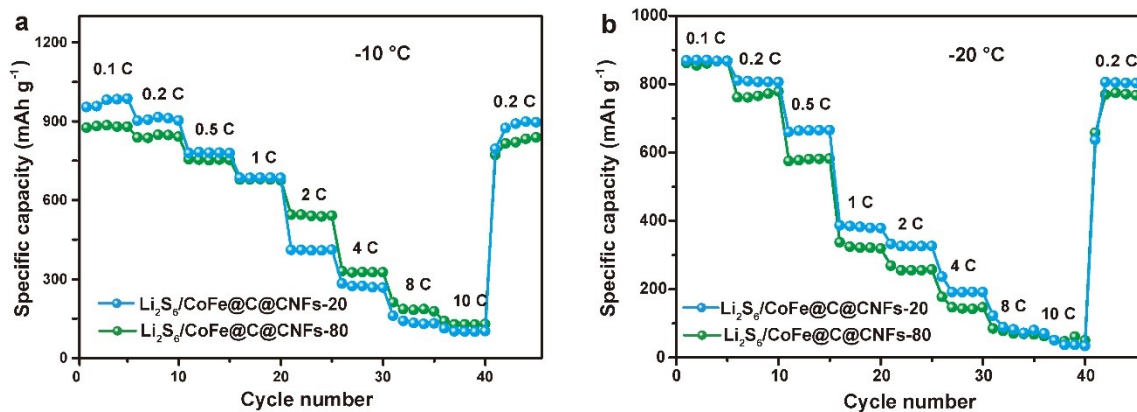

**Fig. S17** Rate performances of Li-S batteries with different electrodes at (a)  $-10\text{ }^{\circ}\text{C}$  and (b)  $-20\text{ }^{\circ}\text{C}$ .

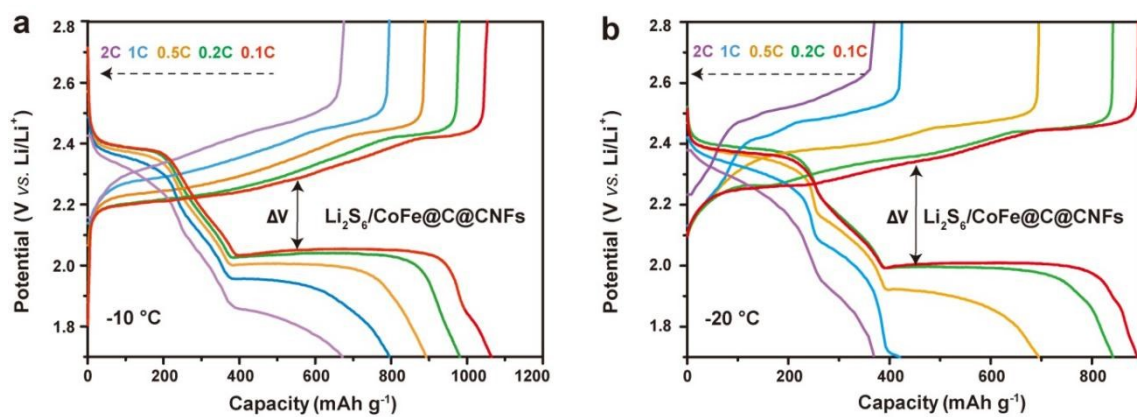

**Fig. S18** Galvanostatic discharge/charge profiles of Li-S batteries with  $\text{Li}_2\text{S}_6/\text{CoFe@C@CNFs}$  at  $-10\text{ }^{\circ}\text{C}$  and  $-20\text{ }^{\circ}\text{C}$ .

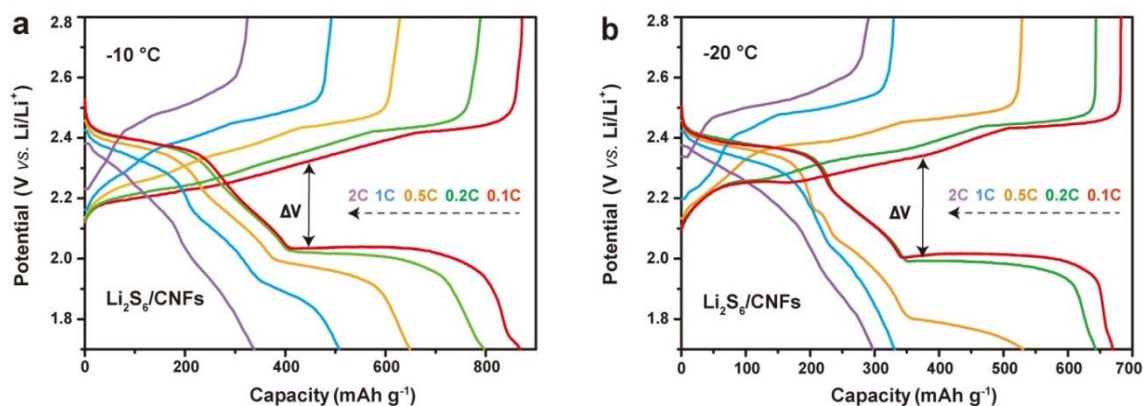

**Fig. S19** Galvanostatic discharge/charge profiles of Li-S batteries with  $\text{Li}_2\text{S}_6/\text{CNFs}$  at  $-10\text{ }^{\circ}\text{C}$  and  $-20\text{ }^{\circ}\text{C}$ .

**Table S1.** The contents of the two metals in different materials.

| Samples        | Co    | Fe    |
|----------------|-------|-------|
| CoFe@C@CNFs-20 | 4.05% | 3.84% |
| CoFe@C@CNFs-40 | 5.15% | 4.89% |
| CoFe@C@CNFs-80 | 7.73% | 7.33% |

**Table S2.** Impedance parameters and electrical conductivity of different materials.

| Samples        | $R_s$ ( $\Omega$ ) | $R_{ct}$ ( $\Omega$ ) | Electrical Conductivity( $S\ cm^{-1}$ ) |
|----------------|--------------------|-----------------------|-----------------------------------------|
| CNFs           | 1.8                | 25.7                  | 1.08987768                              |
| CoFe@C@CNFs-20 | 1.5                | 10.5                  | 2.62221549                              |
| CoFe@C@CNFs-40 | 1.7                | 7.85                  | 1.79558391                              |
| CoFe@C@CNFs-80 | 1.7                | 16.9                  | 1.30053076                              |

**Table S3.** Performances comparison of this work with other cells using  $Li_2S_6$  as the active substance.

| Materials                            | 0.1C<br>(mAh g <sup>-1</sup> ) | 0.5C<br>(mAh g <sup>-1</sup> ) | 2C<br>(mAh g <sup>-1</sup> ) | 10C<br>(mAh g <sup>-1</sup> ) | Ref.      |
|--------------------------------------|--------------------------------|--------------------------------|------------------------------|-------------------------------|-----------|
| $Li_2S_6$ /rGO                       | 1607                           | 1381                           | 1194                         | —                             | [7]       |
| $Li_2S_6$ @SnS <sub>2</sub> @N-CNFs  | 1137                           | 809                            | —                            | —                             | [8]       |
| $Li_2S_6$ /CNF/rGO                   | —                              | 623                            | 581                          | —                             | [9]       |
| WS <sub>2</sub> - rGO-CNT/ $Li_2S_6$ | 1270                           | 1030                           | 614                          | —                             | [10]      |
| CSCNC@ $Li_2S_6$                     | 1377                           | 1022                           | —                            | —                             | [11]      |
| Mo <sub>2</sub> C@CFs@ $Li_2S_6$     | 1137                           | 875                            | 637                          | —                             | [12]      |
| $Li_2S_6$ /CoFe@C@CNFs               | 1655                           | 1316                           | 1197                         | 828                           | This work |



**Table S4.** Performances comparison of this work with other cells using elemental sulfur as the active substance.

| Materials             | 0.2C<br>(mAh g <sup>-1</sup> ) | 0.5C<br>(mAh g <sup>-1</sup> ) | 2C<br>(mAh g <sup>-1</sup> ) | 10C<br>(mAh g <sup>-1</sup> ) | Ref.      |
|-----------------------|--------------------------------|--------------------------------|------------------------------|-------------------------------|-----------|
| S@CoFe-MCS            | 1210                           | 1050                           | 750                          | —                             | [13]      |
| S@CoFe/N-doped carbon | 1275                           | 1050                           | 718                          | —                             | [14]      |
| S/FeCo-C              | 1250.8                         | 966.6                          | 814.1                        | —                             | [15]      |
| Fe/Co-N@C/S           | 1308                           | —                              | 802                          | —                             | [16]      |
| Fe/Co-C3N4/C/S        | 911                            | 692                            | 453                          | —                             | [17]      |
| S/Co@N-C              | 1100                           | 870                            | 666                          | 290                           | [18]      |
| S/CoFe@C@CNFs         | 1215                           | 1087                           | 970                          | 628                           | This work |

**Table S5.** Performances comparison of this work with previous works at -20 °C.

| Materials                                   | 0.1C<br>(mAh g <sup>-1</sup> ) | 0.5C<br>(mAh g <sup>-1</sup> ) | 2C<br>(mAh g <sup>-1</sup> ) | Ref.      |
|---------------------------------------------|--------------------------------|--------------------------------|------------------------------|-----------|
| nanocarbon/sulfur                           | 755                            | 360                            | 234                          | [19]      |
| BN/graphene                                 | —                              | 669                            | —                            | [20]      |
| GO-Zn(II)-AmTZ/sulfur                       | 620                            | 354                            | —                            | [21]      |
| Boron nitride nanosheet electrolyte         | 525                            | —                              | —                            | [22]      |
| Nitrogen-Enriched Carbons/Sulfur            | —                              | 370                            | —                            | [23]      |
| Li <sub>2</sub> S <sub>6</sub> /CoFe@C@CNFs | 890                            | 695                            | 369                          | This work |

## Supplementary references

- 1 J. Hutter, M. Iannuzzi, F. Schiffmann, J. VandeVondele, *Wires. Comput. Mol. Sci.* **2014**, 4, 15.
- 2 T. D. Kuhne, M. Iannuzzi, M. Del Ben, V. V. Rybkin, P. Seewald, F. Stein, T. Laino, R. Z. Khaliullin, O. Schutt, F. Schiffmann, D. Golze, J. Wilhelm, S. Chulkov, M. H. Bani-Hashemian, V. Weber, U. Borstnik, M. Taillefumier, A. S. Jakobovits, A. Lazzaro, H. Pabst, T. Muller, R. Schade, M. Guidon, S. Andermatt, N. Holmberg, G. K. Schenter, A. Hehn, A. Bussy, F. Belleflamme, G. Tabacchi, A. Gloss, M. Lass, I. Bethune, C. J. Mundy, C. Plessl, M. Watkins, J. VandeVondele, M. Krack, J. Hutter, *J. Chem. Phys.* **2020**, 152, 194103.
- 3 John, P., Perdew, Kieron, Burke, Matthias, Ernzerhof, *Phys. Rev. Lett.* **1997**.
- 4 S. Goedecker, M. Teter, J. Hutter, *Phys. Rev. B: Condens. Matter.* **1995**, 54, 1703.
- 5 G. Henkelman, B. P. Uberuaga, H. Jonsson, *J. Chem. Phys.* **2000**, 113, 9901.
- 6 J. Shen, Z. Wang, X. Xu, Z. Liu, D. Zhang, F. Li, Y. Li, L. Zeng, J. Liu, *Adv. Energy Sustainability Res.* **2021**, 2, 2100007.
- 7 P. Chiochan, S. Kosasang, N. Ma, S. Duangdangchote, M. Sawangphruk, *Carbon* **2019**, 158.
- 8 S. S. Yao, C. J. Zhang, F. W. Xie, S. K. Xue, K. D. Gao, R. D. Guo, X. Q. Shen, T. B. Li, S. B. Qin, *Acs Sustain. Chem. Eng.* **2020**, 8, 2707.
- 9 S. C. Han, X. Pu, X. L. Li, M. M. Liu, M. Li, N. Feng, S. Dou, W. G. Hu, *Electrochim. Acta* **2017**, 241, 406.
- 10 S. Huang, Y. Wang, J. Hu, Y. V. Lim, D. Kong, Y. Zheng, M. Ding, M. E. Pam, H. Y. Yang, *ACS Nano* **2018**, 12, 9504.
- 11 S. S. Yao, C. J. Zhang, R. D. Guo, A. Majeed, Y. P. He, Y. Q. Wang, X. Q. Shen, T. B. Li, S. B. Qin, *Acs Sustainable Chem. Eng.* **2020**, 8, 13600.

- 12 Y. Y. Li, S. S. Yao, C. J. Zhang, Y. P. He, Y. Q. Wang, Y. Z. Liang, X. Q. Shen, T. B. Li, S. B. Qin, W. Wen, *Int. J. Energy Res.* **2020**, 44, 8388.
- 13 Z. Shi, Z. Sun, J. Cai, Z. Fan, J. Jin, M. Wang and J. Sun, *Adv. Func. Mater.* **2021**, 31, 2006798.
- 14 W. Qi, W. Wu, B. Cao, Y. Zhang and Y. Wu, *Inter. J. Hydrogen Energy* **2019**, 44, 20257-20266.
- 15 H. Li, L. Fei, R. Zhang, S. Yu, Y. Zhang, L. Shu, Y. Li and Y. Wang, *J. Energy Chem.* **2020**, 49, 339-347.
- 16 H. L. Ye, J. G. Sun, S. L. Zhang, H. B. Lin, T. R. Zhang, Q. F. Yao, J. Y. Lee, *ACS Nano* **2019**, 13, 14208-14216.
- 17 Y. F. Li, M. F. Chen, P. Zeng, H. Liu, H. Yu, Z. G. Luo, Y. Wang, B. B. Chang, X. Y. Wang, *J. Alloys Comp.* **2021**, 873, 159883.
- 18 Y. J. Li, J. M. Fan, J. H. Zhang, J. F. Yang, R. M. Yuan, J. K. Chang, M. S. Zheng, *ACS Nano* **2017**, 11, 11417-11424.
- 19 J. Q. Huang, X. F. Liu, Q. Zhang, C. M. Chen, M. Q. Zhao, S. M. Zhang, W. C. Zhu, W. Z. Qian, F. Wei, *Nano Energy* **2013**, 2, 314.
- 20 D. R. Deng, F. Xue, C. D. Bai, J. Lei, R. Yuan, M. S. Zheng, Q. F. Dong, *ACS Nano* **2018**, 12, 11120.
- 21 Z. Q. Zhang, Y. Q. Wang, J. Liu, D. Y. Sun, X. D. Ma, Y. C. Jin, Y. J. Cui, *Electrochim. Acta* **2018**, 271, 58.
- 22 J. Y. Wu, X. W. Li, Z. X. Rao, X. N. Xu, Z. X. Cheng, Y. Q. Liao, L. X. Yuan, X. L. Xie, Z. Li, Y. H. Huang, *Nano Energy* **2020**, 72, 104725.
- 23 S. Zhu, Y. Wang, J. Jiang, X. Yan, D. Sun, Y. Jin, C. Nan, H. Munakata, K. Kanamura, *ACS Appl. Mater. Interfaces* **2016**, 8, 17253.
